# Supplementary material for: Valproic acid inhibits cell growth in both MCF-7 and MDA-MB231 cells by triggering different responses in a cell type-specific manner
Source: Springer Nature journal article supplement (doi:10.1186/s12967-023-04015-8), 2023-03-02
Supplement: MOESM1 [file 24087632]

**A****MCF-7**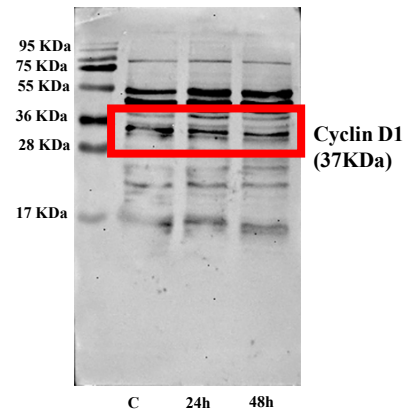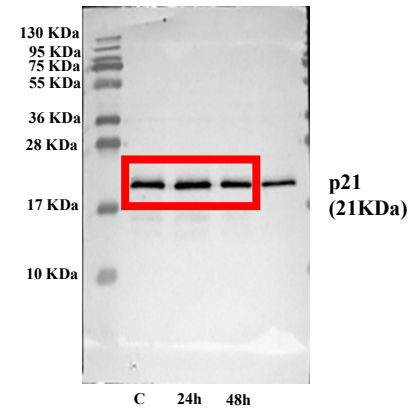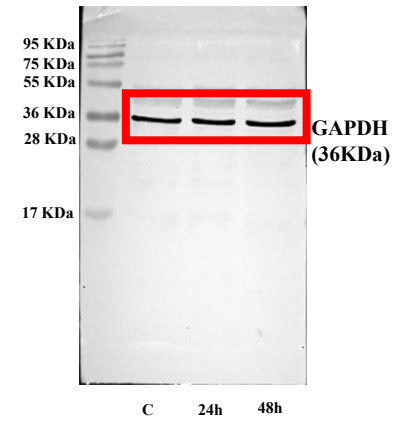**B****MDA-MB-231**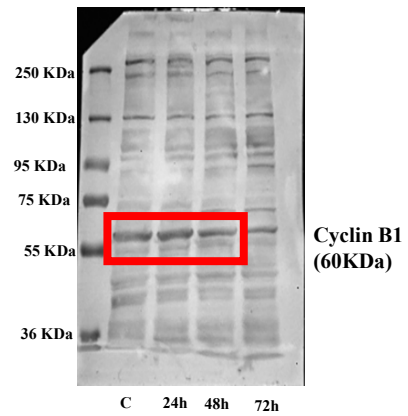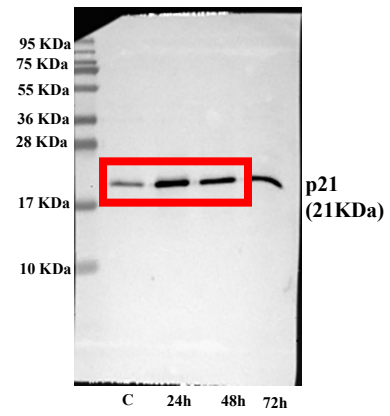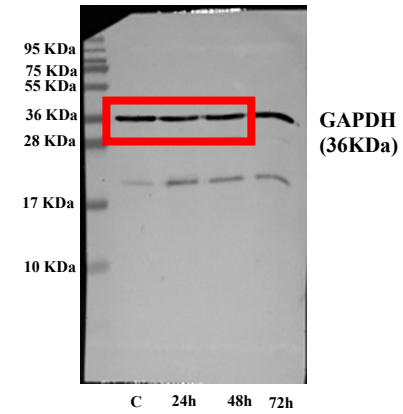**Figure 3**

# MCF-7

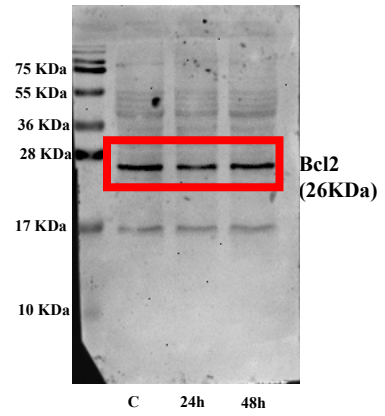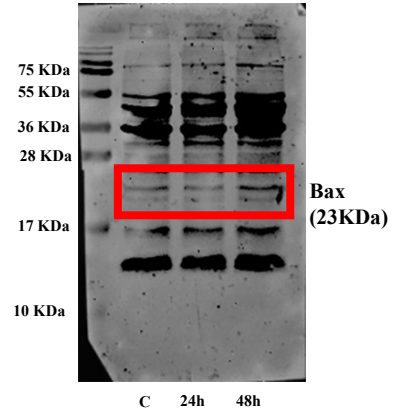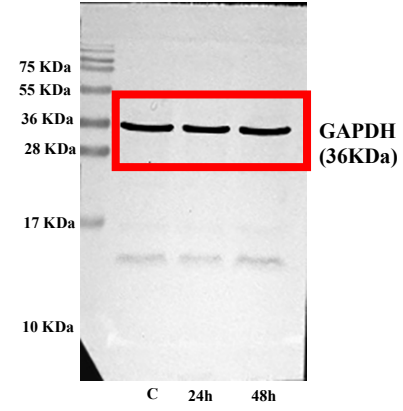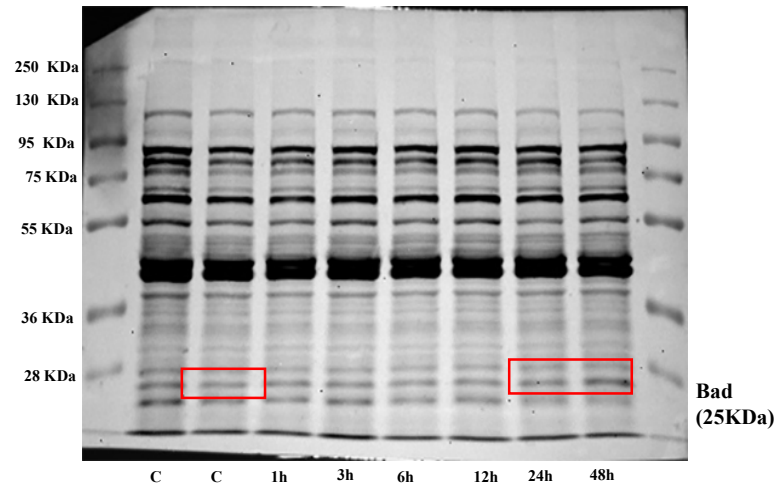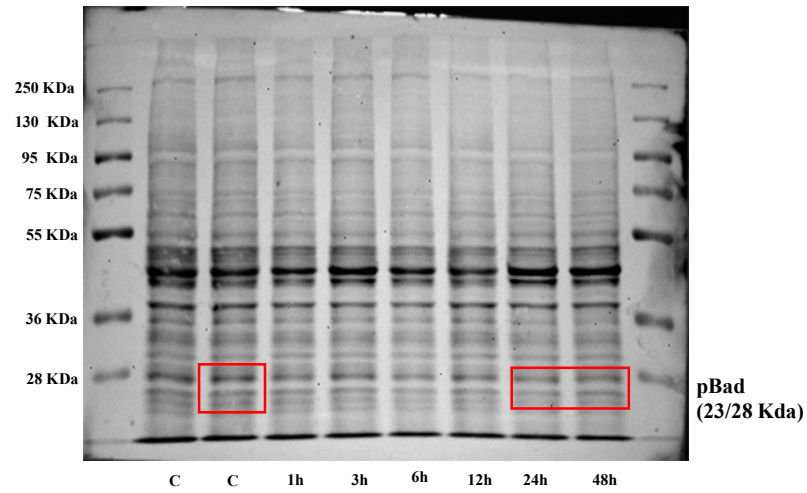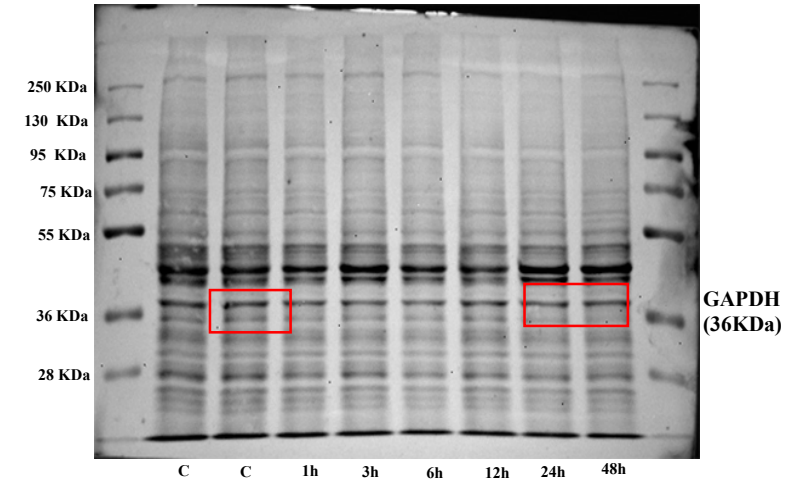

Figure 6

# MDA-MB-231

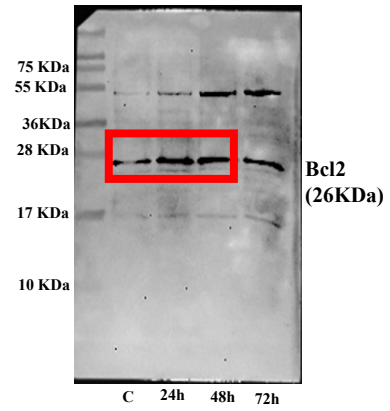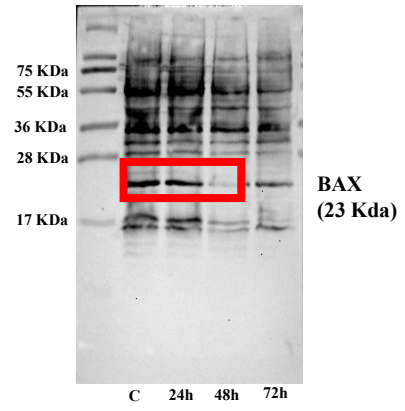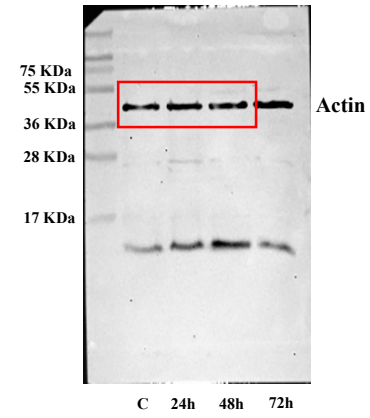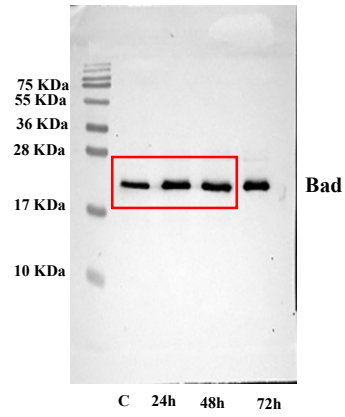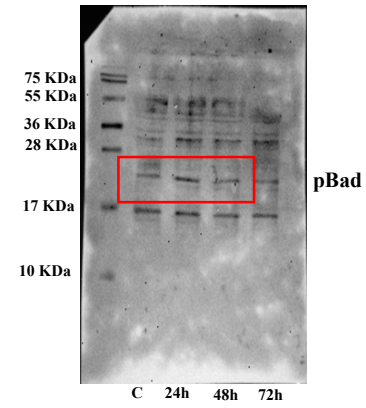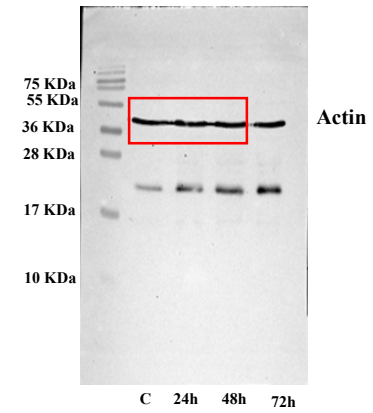

Figure 7

# MCF-7

## A

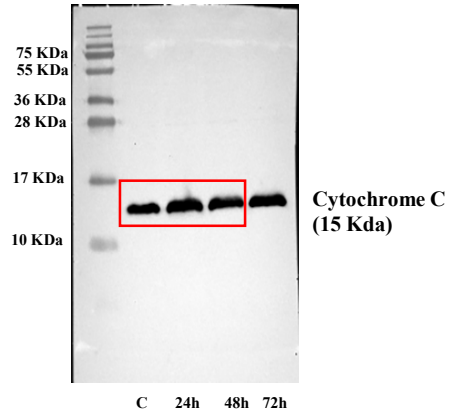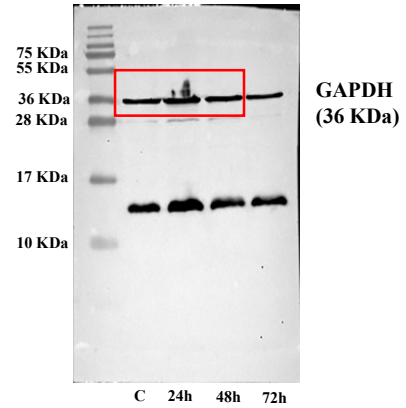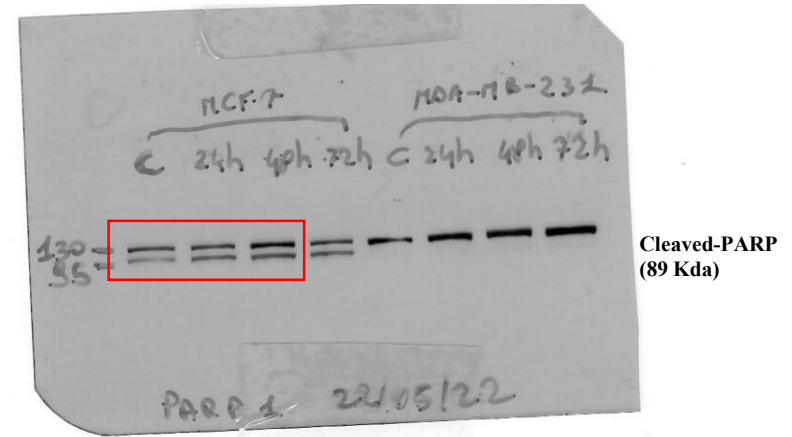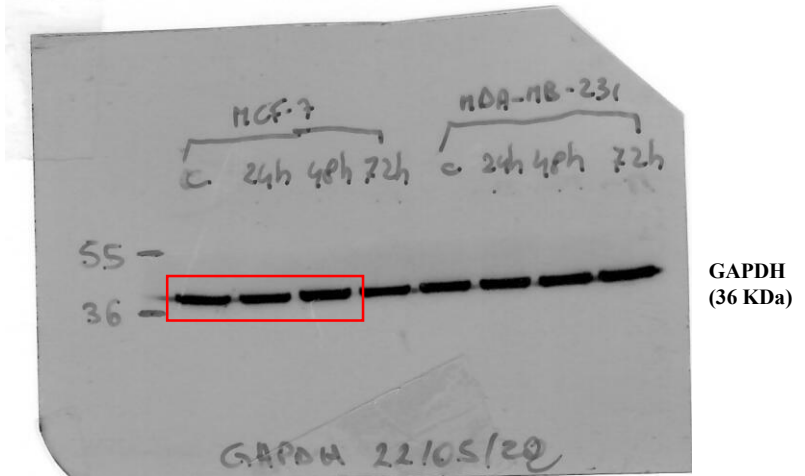

Figure 8 A

# MDA-MB-231

## B

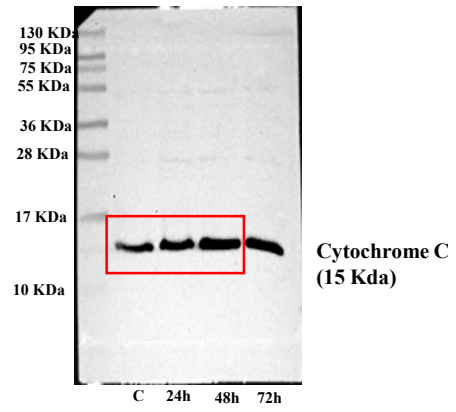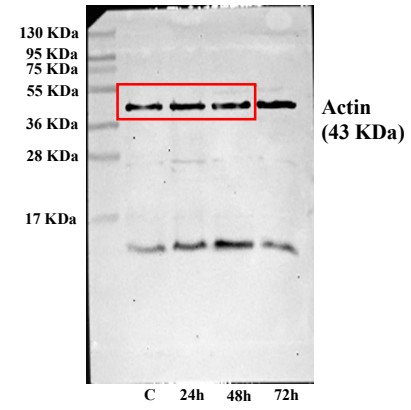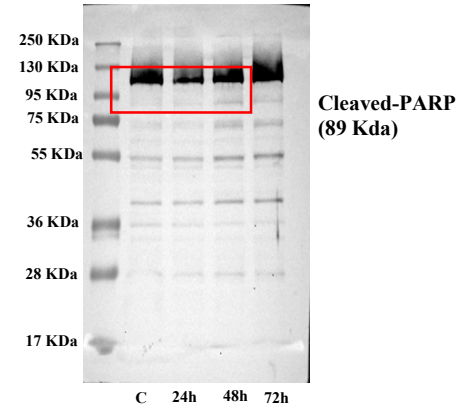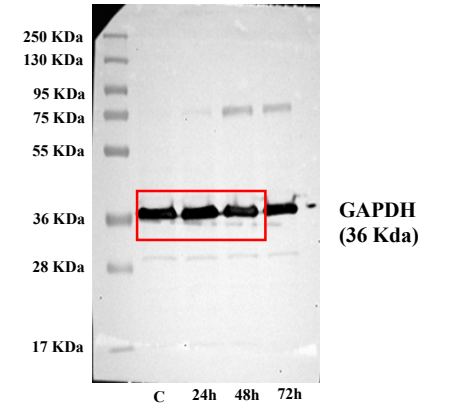

Figure 8 B

**A****MCF-7**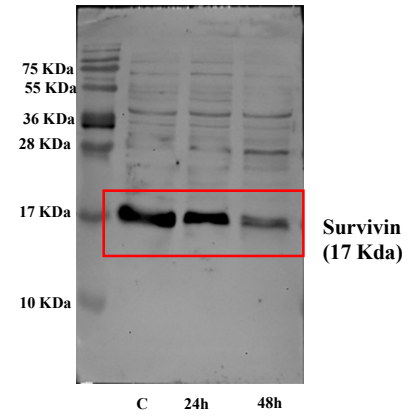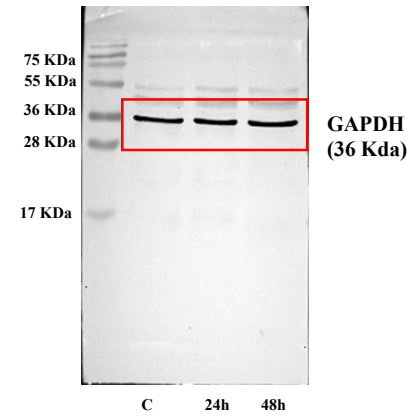**B****MDA-MB-231**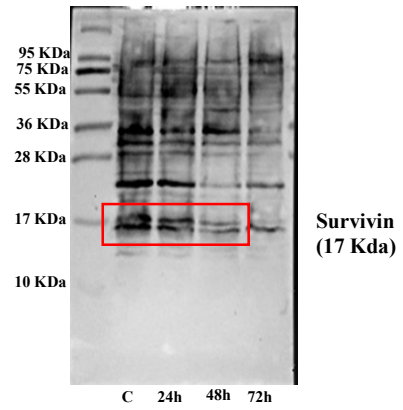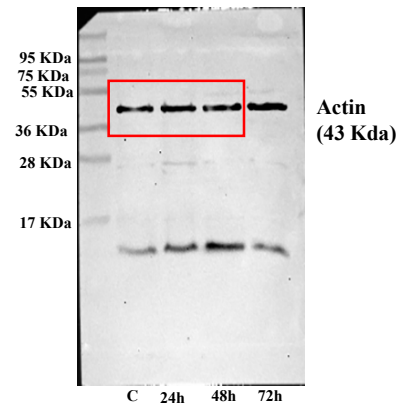**Figure 9**

**A****MCF-7**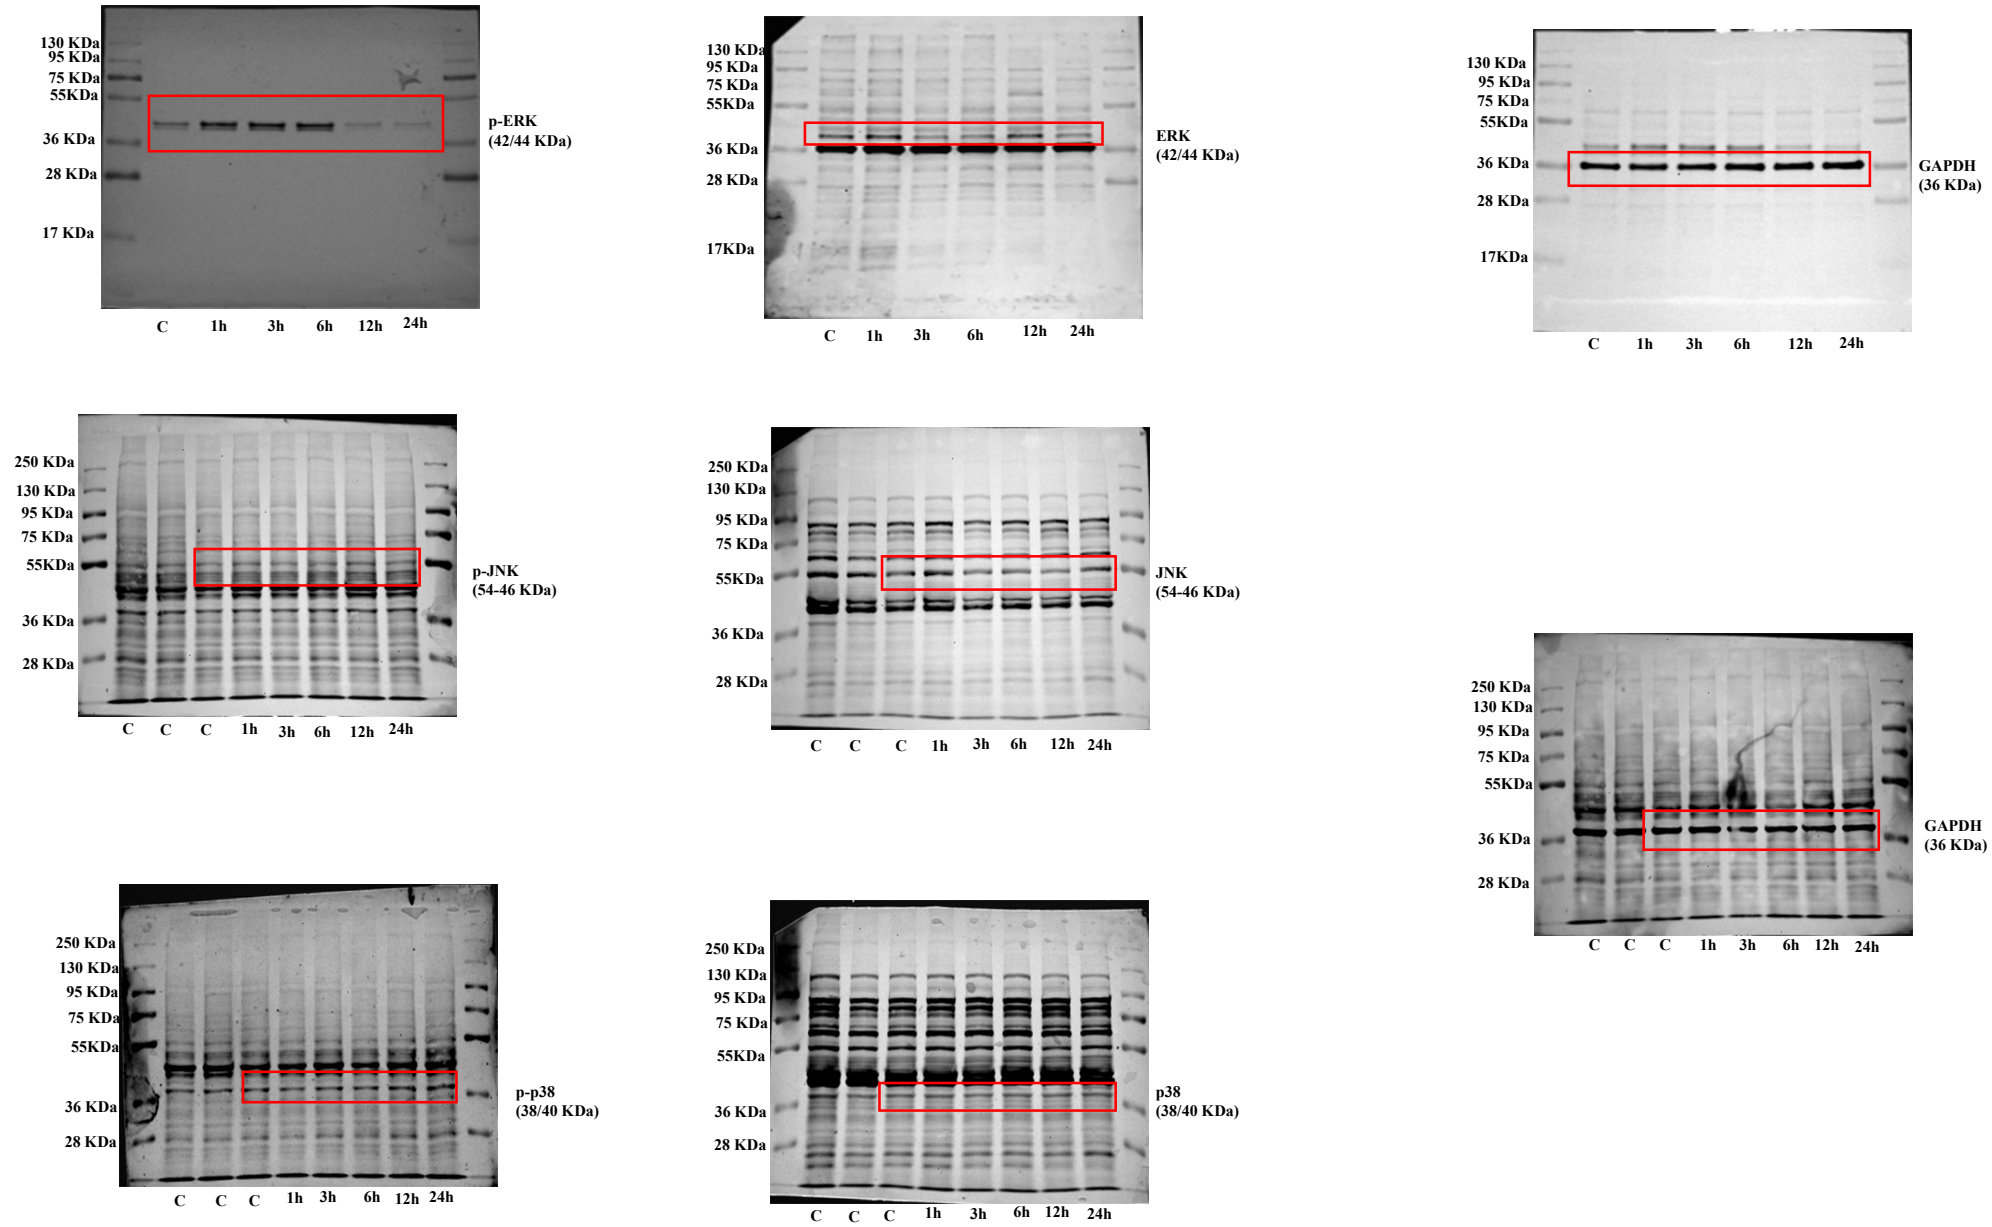**Figure 10 A**



**B****MDA-MB-231**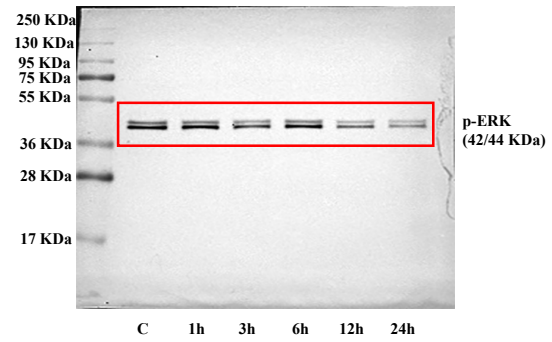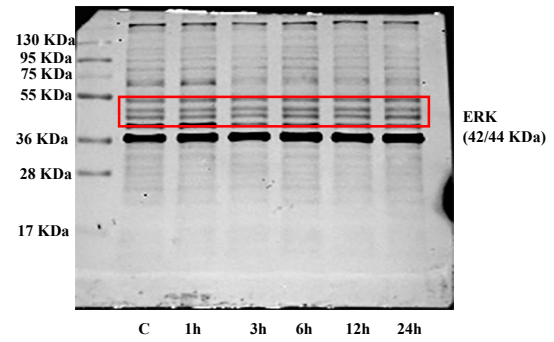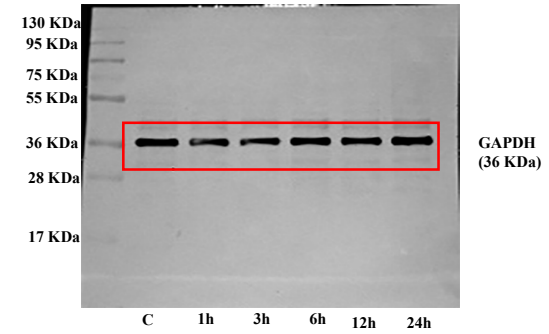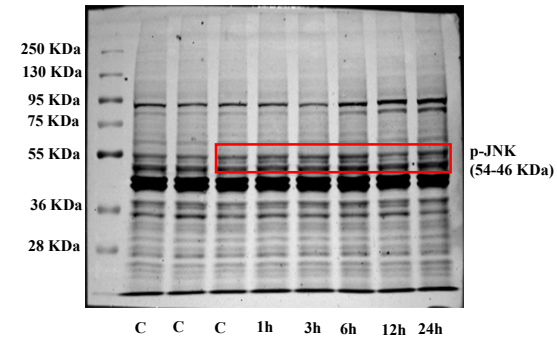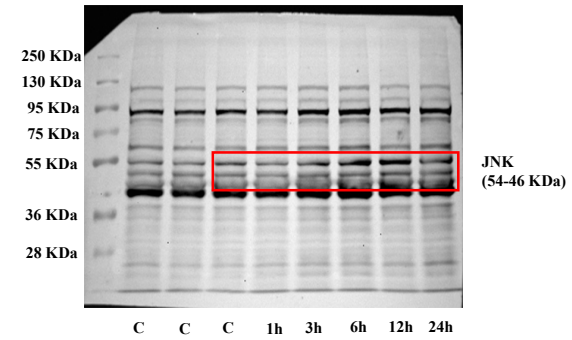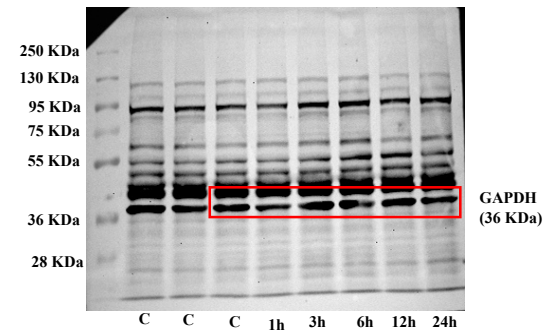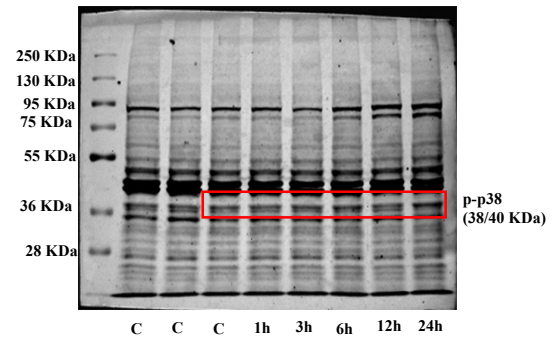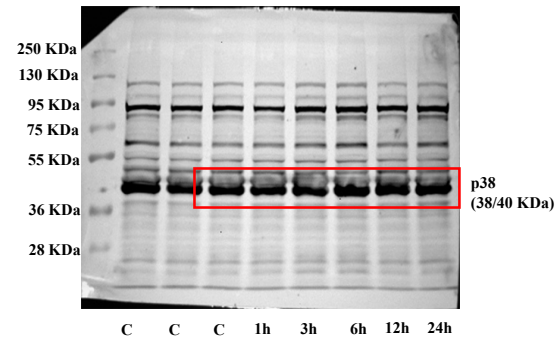**Figure 10 B**



**A****MCF-7**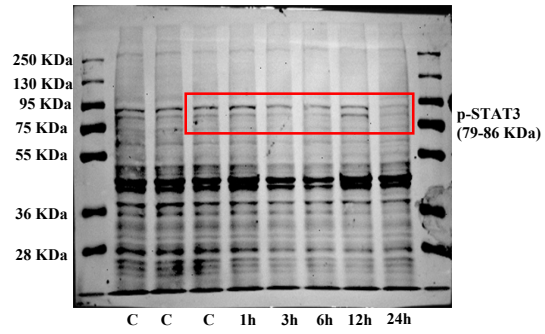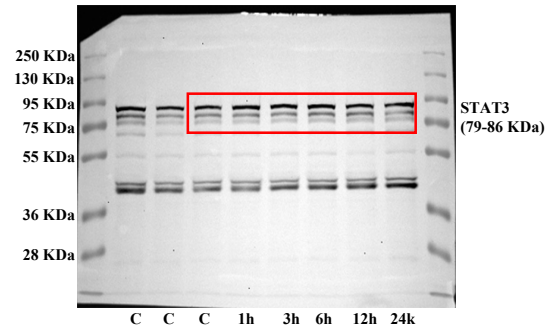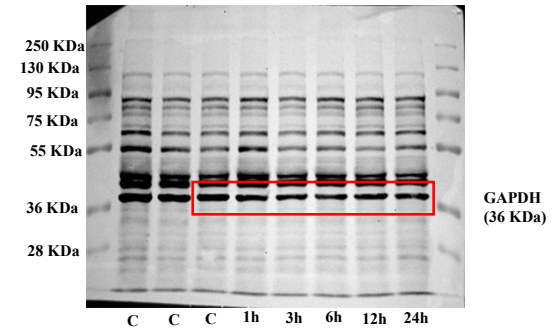**B****MDA-MB-231**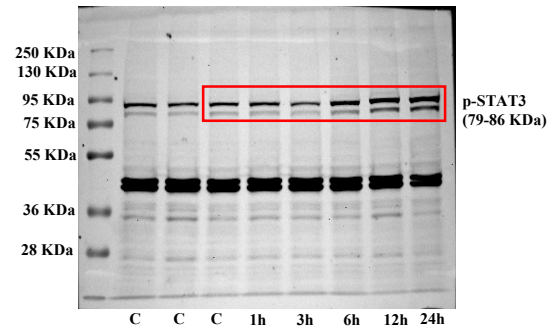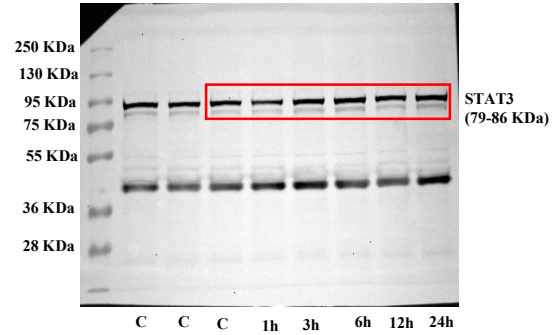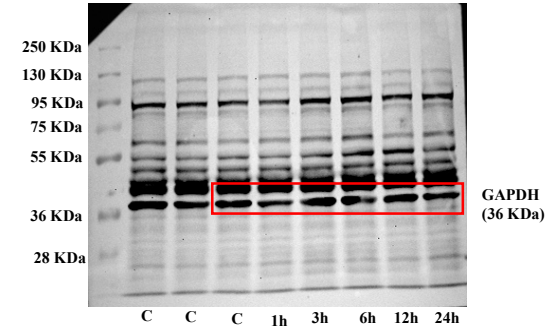**Figure 11**

**A** MCF-7

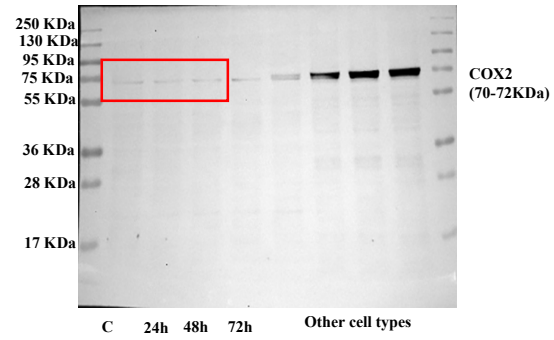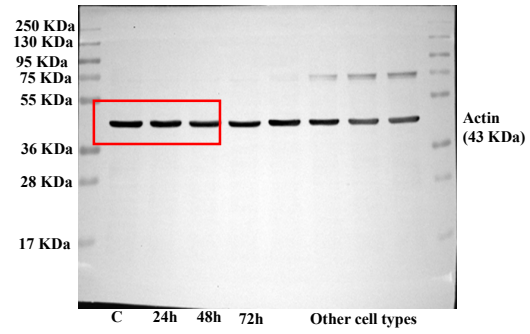

**B** MDA-MB-231

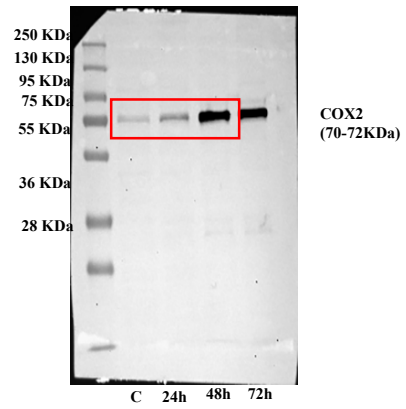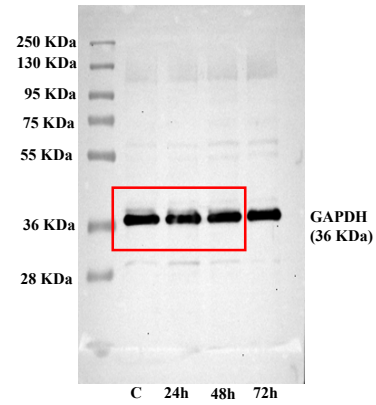

Figure 12

**A** MCF-7

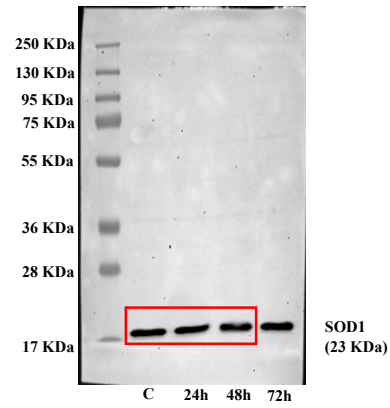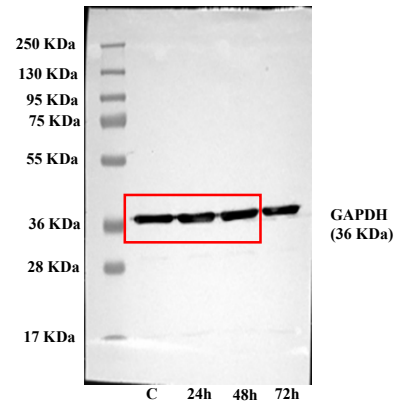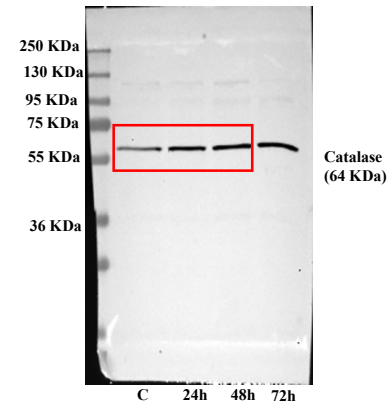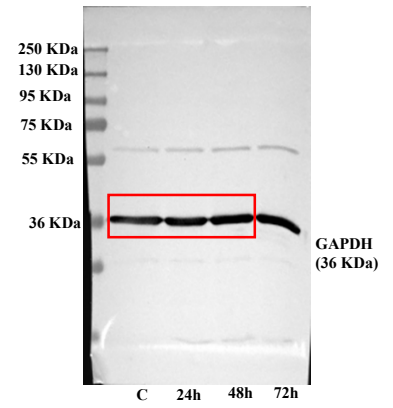

**B** MDA-MB-231

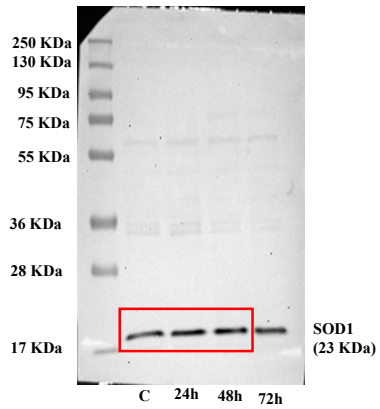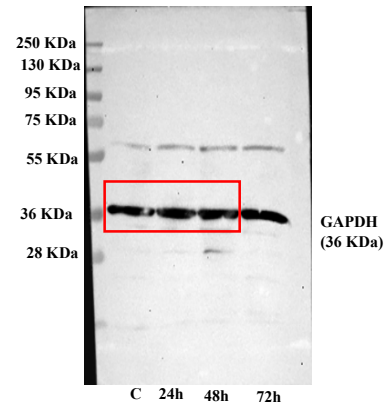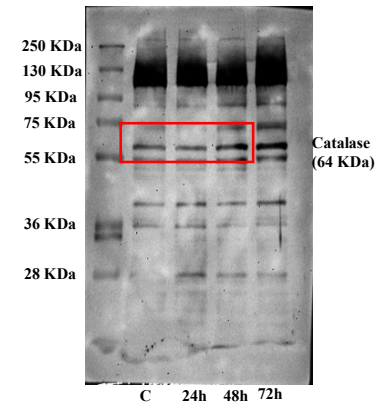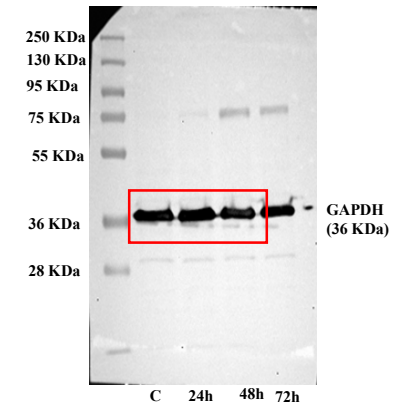

**Figure 13**
