# Supplementary material for: Valproic acid inhibits cell growth in both MCF-7 and MDA-MB231 cells by triggering different responses in a cell type-specific manner
Source: Springer Nature journal article supplement (doi:10.1186/s12967-023-04015-8), 2023-03-02
Supplement: MOESM2 [file 24087632]

| Antibody        | Catalog Number | Dilution | Manufacturer                                       |
|-----------------|----------------|----------|----------------------------------------------------|
| Anti-Cyclin D1  | MA514512       | 1:1000   | Invitrogen, Thermo Fisher Scientific               |
| Anti-Cyclin B1  | PA5120418      | 1:1000   | Invitrogen, Thermo Fisher Scientific               |
| Anti-p21        | MA531479       | 1:1000   | Invitrogen, Thermo Fisher Scientific               |
| Anti-p38        | AH01202        | 1:1000   | Invitrogen, Thermo Fisher Scientific               |
| Anti-p-ERK      | MA515173       | 1:1000   | Invitrogen, Thermo Fisher Scientific               |
| Anti-p-JNK1/2/3 | bsm52462R      | 1:1000   | Bios, Massachusetts, USA                           |
| Anti-Bax        | bsm33279M      | 1:500    | Bios, Massachusetts, USA                           |
| Anti-Bcl2       | sc-7382        | 1:500    | Santa Cruz Biotechnology, DBA, Milan, Italy        |
| Anti-Bad        | sc-8044        | 1:500    | Santa Cruz Biotechnology, DBA, Milan, Italy        |
| Anti-p-Bad      | sc-271963      | 1:500    | Santa Cruz Biotechnology, DBA, Milan, Italy        |
| Anti-Cytocrom C | sc-13156       | 1:500    | Santa Cruz Biotechnology, DBA, Milan, Italy        |
| Anti-Survivin   | sc-10811       | 1:500    | Santa Cruz Biotechnology, DBA, Milan, Italy        |
| Anti-COX2       | sc-19999       | 1:500    | Santa Cruz Biotechnology, DBA, Milan, Italy        |
| Anti-Catalase   | sc-271803      | 1:500    | Santa Cruz Biotechnology, DBA, Milan, Italy        |
| Anti-SOD1       | sc-8637        | 1:500    | Santa Cruz Biotechnology, DBA, Milan, Italy        |
| Anti-ERK2       | sc-154         | 1:500    | Santa Cruz Biotechnology, DBA, Milan, Italy        |
| Anti-Actin      | sc-68879       | 1:500    | Santa Cruz Biotechnology, DBA, Milan, Italy        |
| Anti-JNK        | 9552S          | 1:1000   | Cell Signaling Technology, Euroclone, Milan, Italy |
| Anti-p-p38      | 9211S          | 1:1000   | Cell Signaling Technology, Euroclone, Milan, Italy |
| Anti-pSTAT3     | 9138S          | 1:1000   | Cell Signaling Technology, Euroclone, Milan, Italy |
| Anti-STAT3      | 9139S          | 1:1000   | Cell Signaling Technology, Euroclone, Milan, Italy |
| Anti-GAPDH      | 60004-1-Ig     | 1:1000   | ProteinTech                                        |

**Additional file 2: Table S1.** catalog number and dilution of all the antibodies used
